# Supplementary material
Source: PubMed Central journal article supplement (PMC3037158)
Supplement: en.2010-0774_1.pdf [file en.2010-0774_1.pdf]

1 **Figure legends for Supplemental data**

2

3 Supplemental figure 1. RSV infection does not affect cell viability of A549 or BEAS-2B cells. A549 cells  
4 (A) and BEAS-2B cells (B) were either not inoculated (closed circles) or inoculated with rgRSV (MOI=3)  
5 (open circles) for 1 h followed by incubation for a further 5 h in the presence of increasing concentrations  
6 of dex. Cell viability was measured using the CellTiter-Glo Luminescent assay. No infection and no dex  
7 was normalized to 100% cell viability. Means and SD are shown (n= 3).

8

9 Supplemental figure 2. RSV infection of A549 cells. A549 cells were inoculated with live rgRSV (A and  
10 C) or UV-irradiated rgRSV (B and D) (MOI=3) for 1 h followed by further incubation for 24 h. Cells  
11 were visualized under an inverted fluorescent microscope. A and B - fluorescent images; C and D - phase  
12 contrast images.

13

14 Supplemental figure 3. RSV induction of IL-6 and IL-8 can be reduced by inhibitors of NFκB. A549 cells  
15 were pre-treated for 1 h with 50 μM PDTC (hatched bar) or 10 μM BAY 11-7082 (stripped bar) and then  
16 either mock inoculated with HeLa-conditioned media (black bar) or inoculated with rgRSV (white,  
17 hatched and stripped bars) (MOI=3) for 1 h followed by incubation for a further 5 h (A and B) or  
18 incubation for a further 24 hours in the presence of PDTC and BAY 11-7082 (C and D). RSV induction  
19 of IL-6 (A) and IL-8 (B) mRNA was determined by real-time PCR and normalized to GAPDH and CAP-  
20 1. RSV induction of IL-6 (C) and IL-8 (D) protein was measured by ELISA. Means and SD are shown  
21 (n= 4).

22

23 Supplemental figure 4. RSV infection does not alter GR protein levels. A549 cells were either not  
24 inoculated (black bar) or inoculated with HeLa-conditioned media (mock infected) (white bar) or rgRSV  
25 (MOI=3) (hatched bar) for 1 h followed by incubation with growth media for 5 h. Western blotting of 10

1  $\mu$ g total protein was performed for GR and stripped and re-probed for  $\beta$ -actin. A representative western  
2 blot is shown (A) and quantification using the Kodak Image Station 4000MM Pro (B). Means and SD are  
3 shown (n= 4).

4

5 Supplemental figure 5. RSV infection does not alter GR nuclear translocation. A549 cells were either not  
6 inoculated or inoculated with rgRSV (MOI=3) for 1 h followed by incubation with 100 nM  
7 dexamethasone for 5 h. (A) Nuclear and cytosolic extracts were subjected to SDS-PAGE and western  
8 blotting for GR and RSV proteins. (B) Cells were fixed and permeabilized and the cellular distribution of  
9 GR determined by immunocytochemistry.

10

11 Supplemental figure 6. Dissociation curves of real-time PCR using an input sample from the ChIP and the  
12 ChIP primers for GILZ (A), FKBP51 (B) and MKP-1 (C).

**A**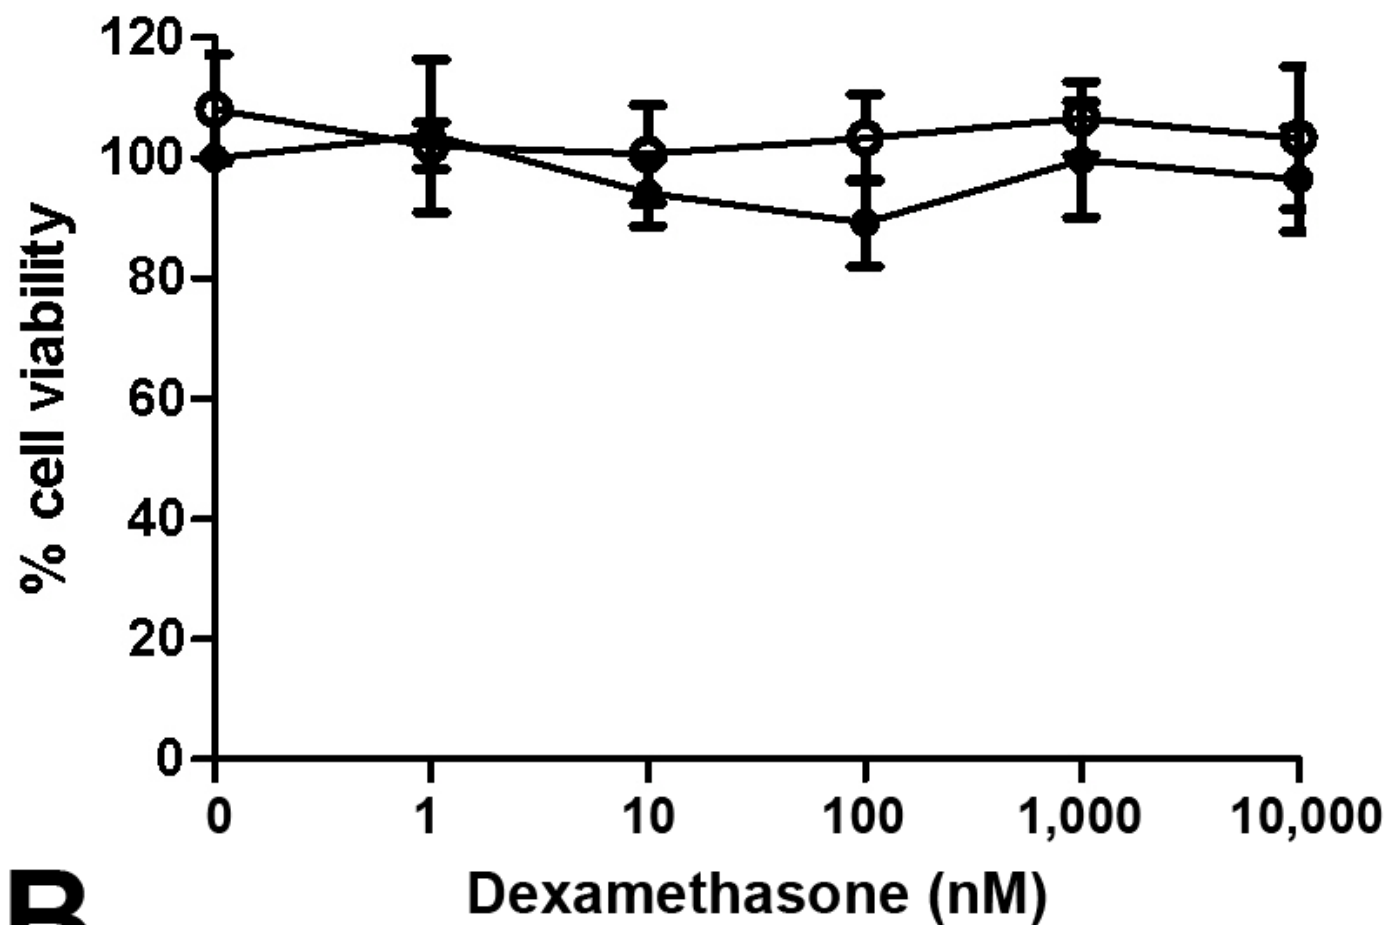**B**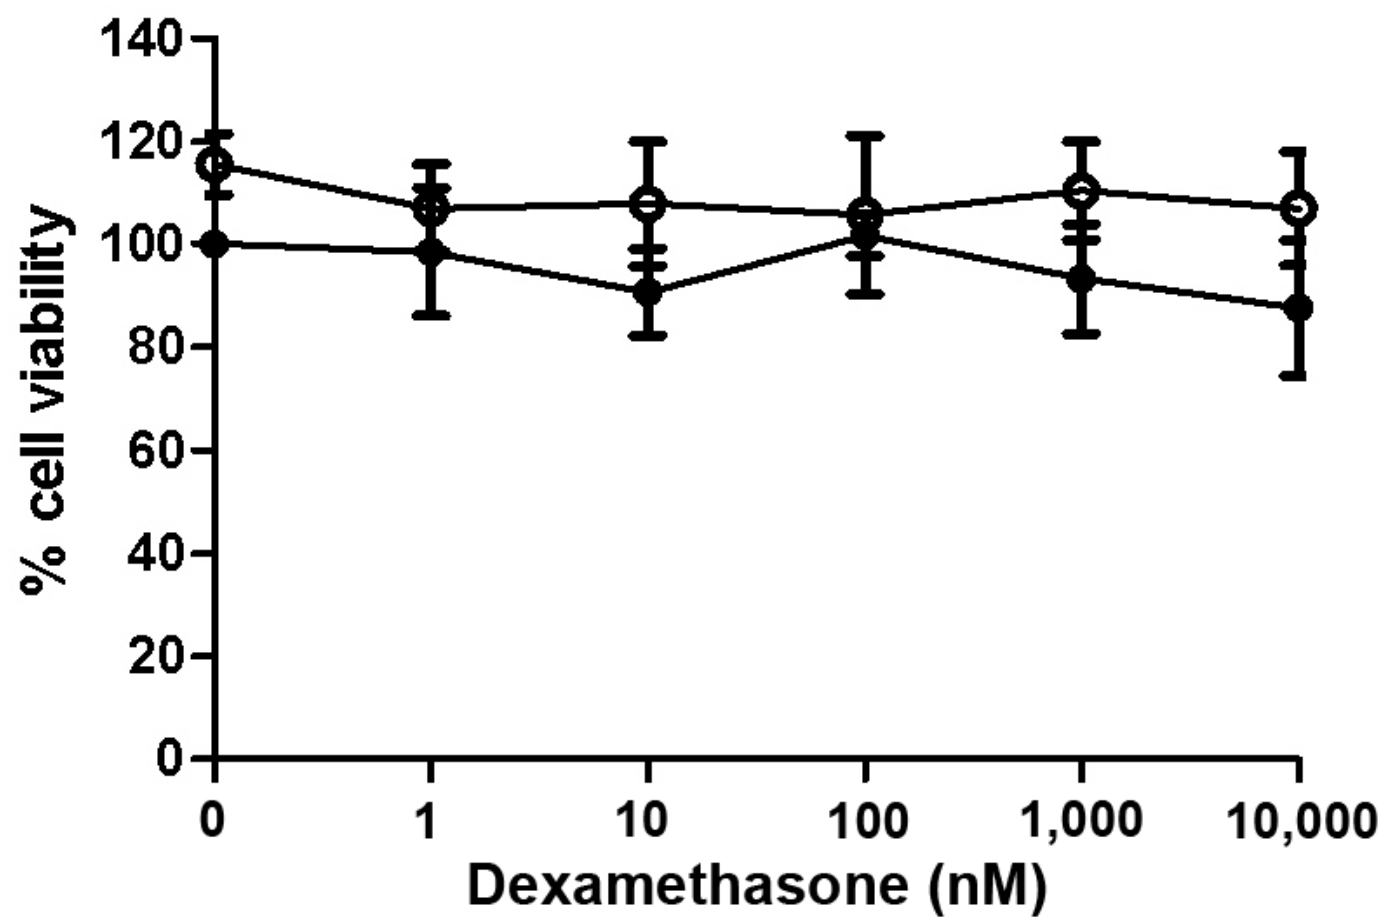

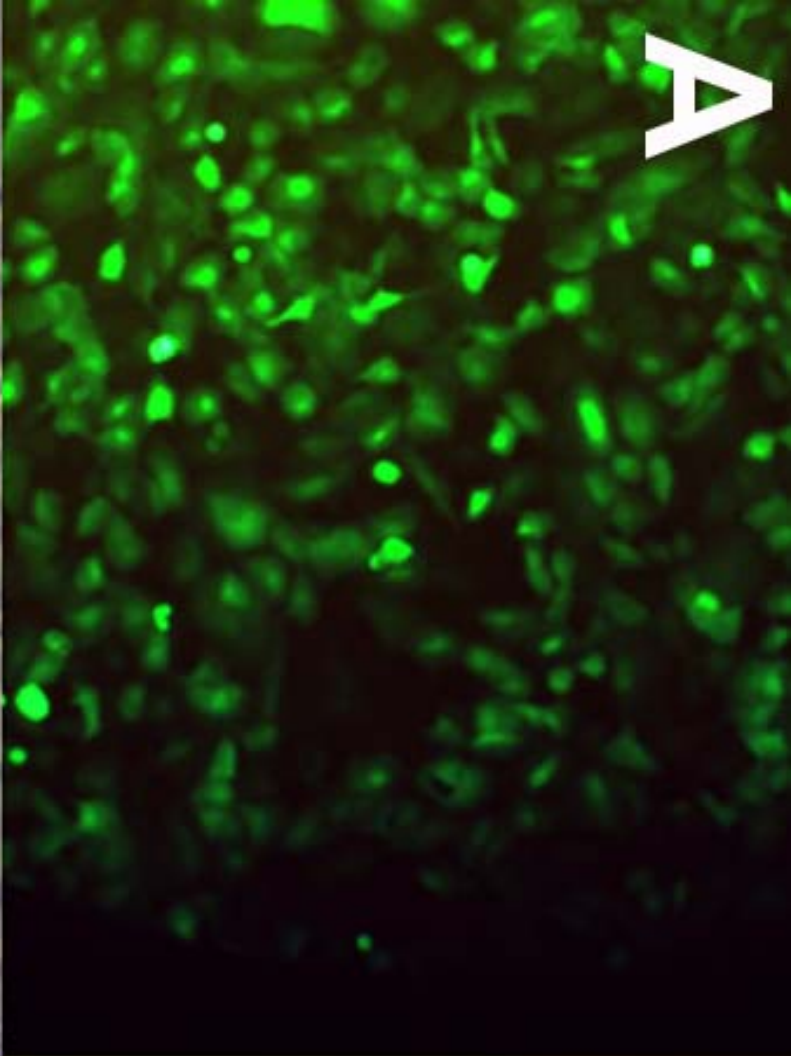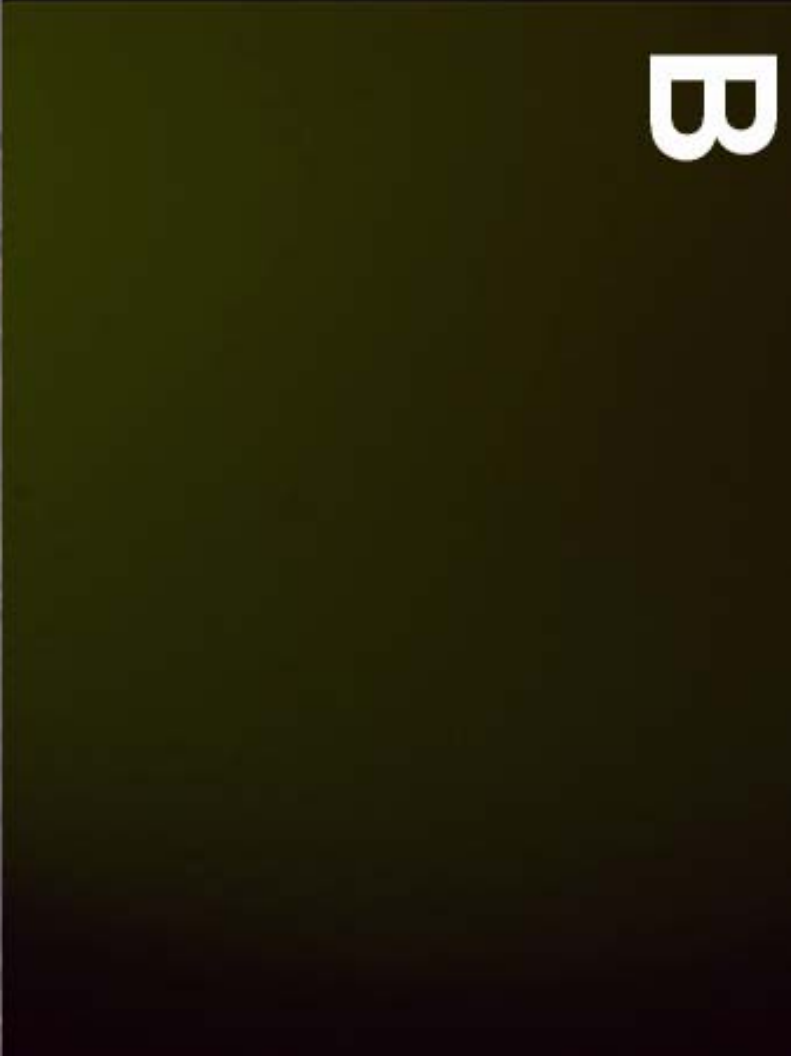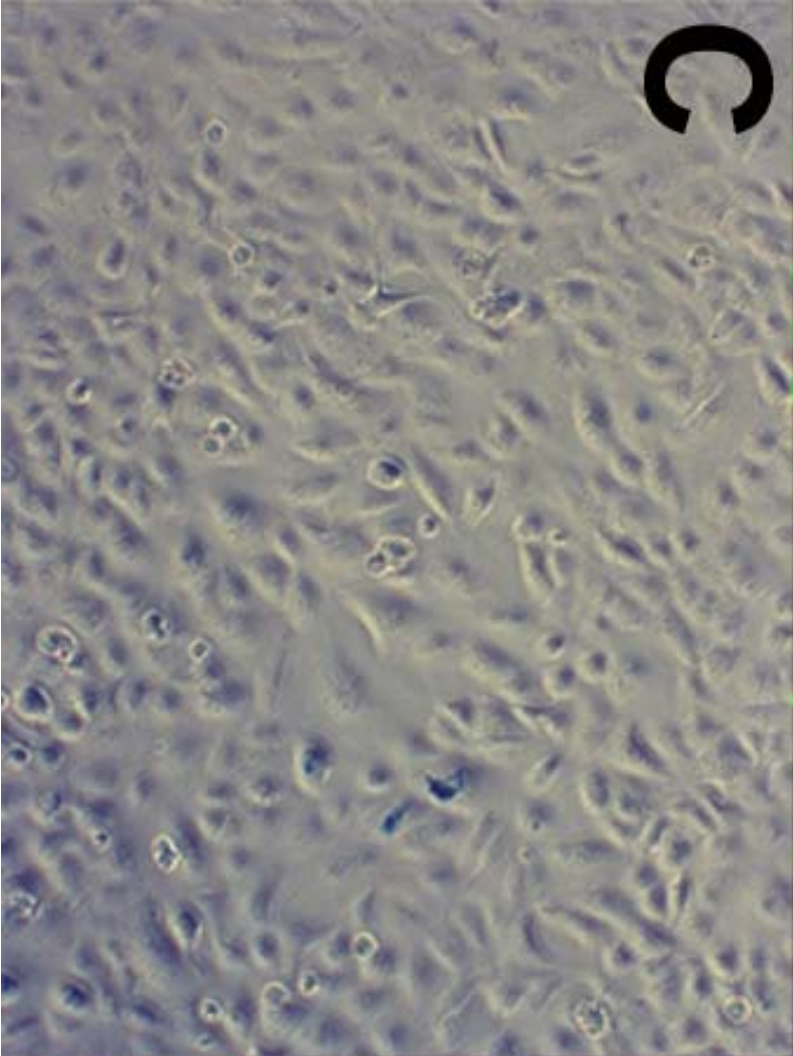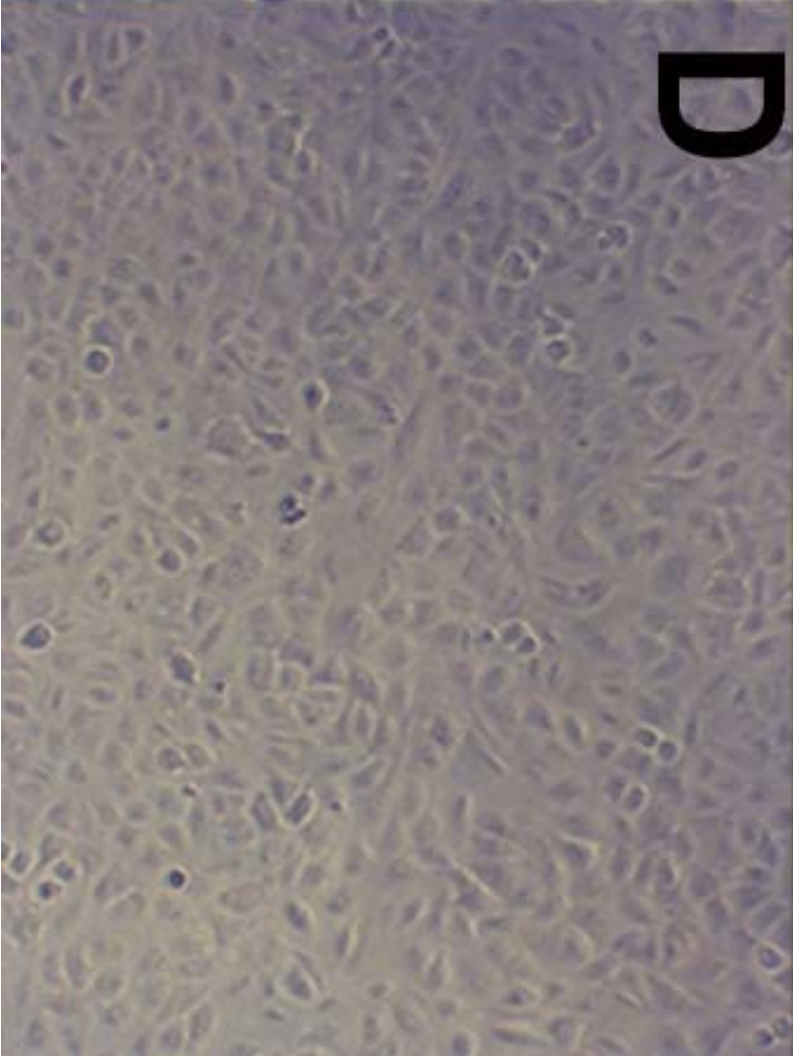

**A**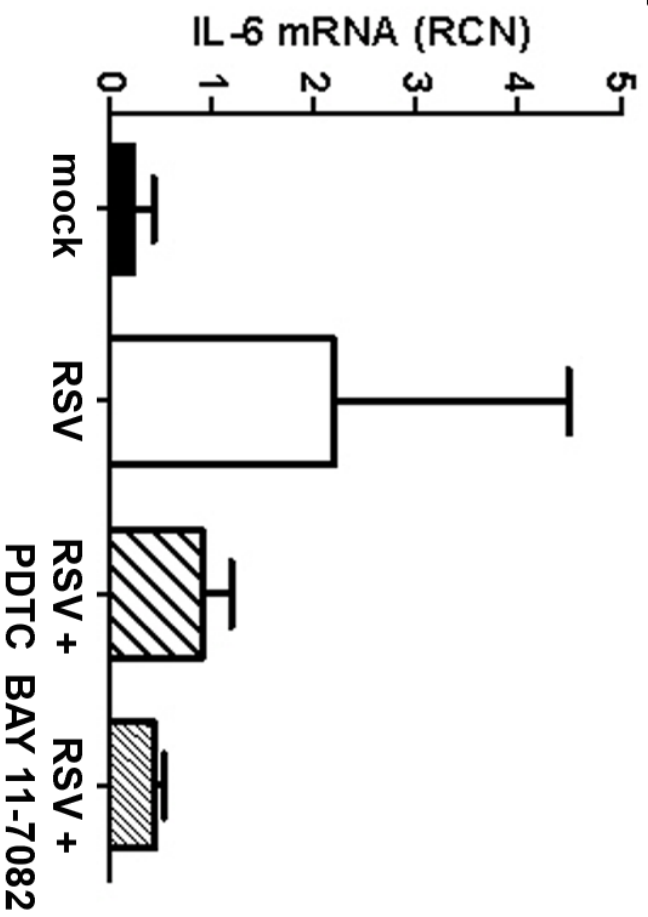**B**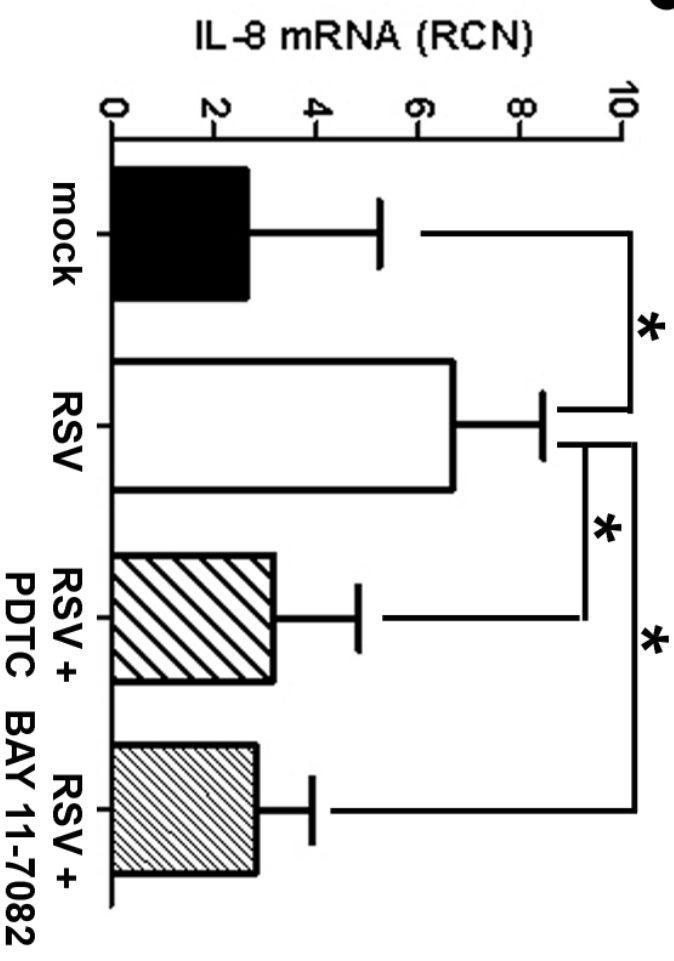**C**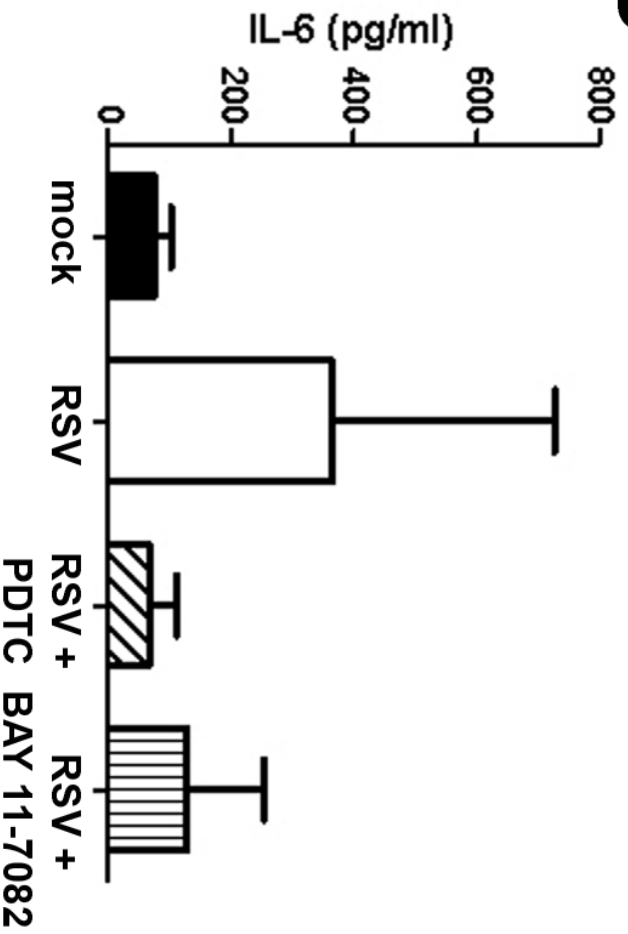**D**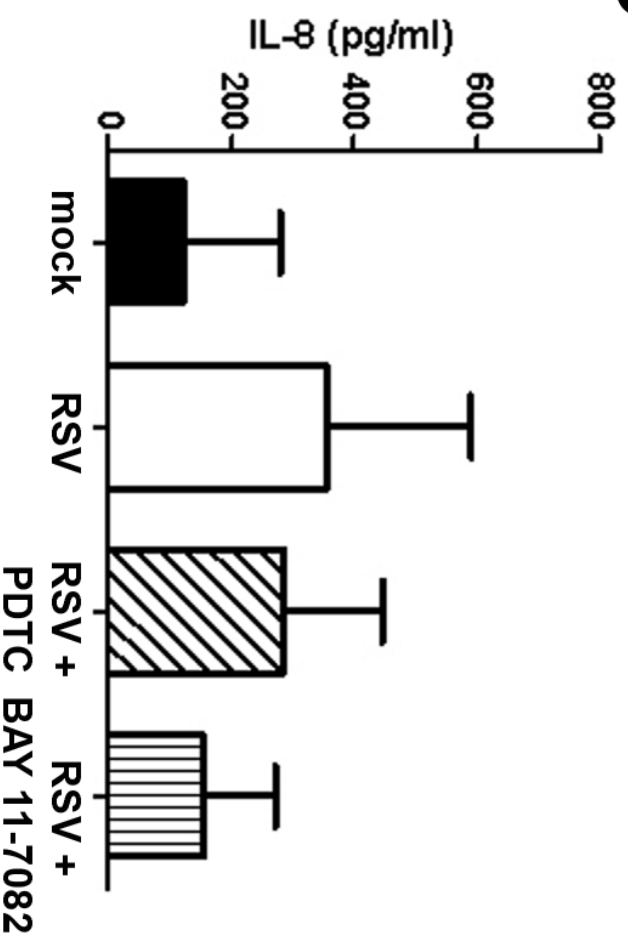

**A**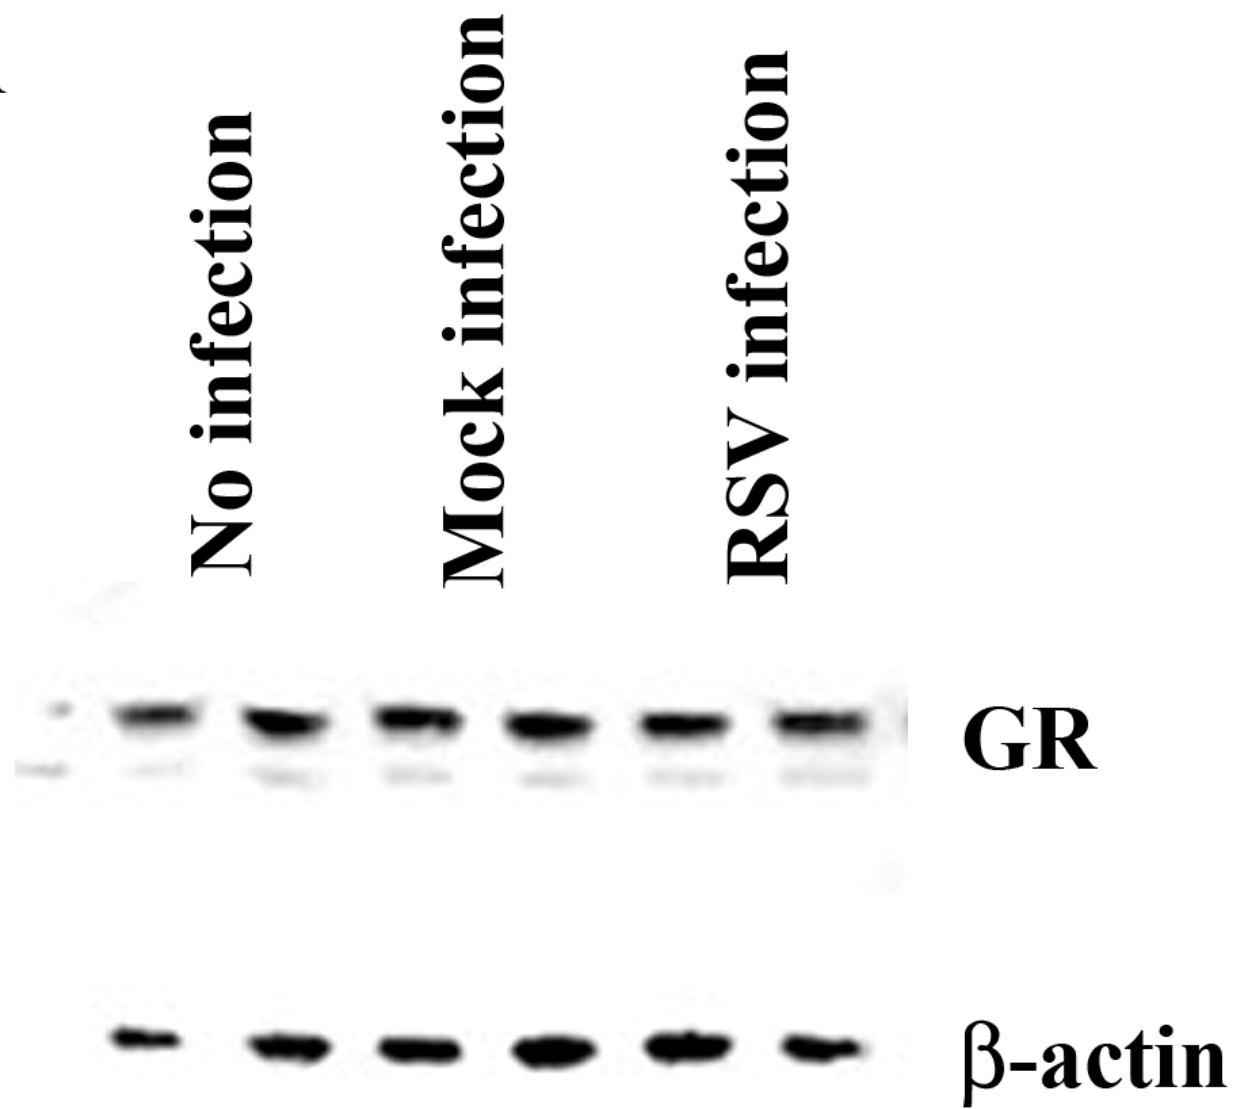**B**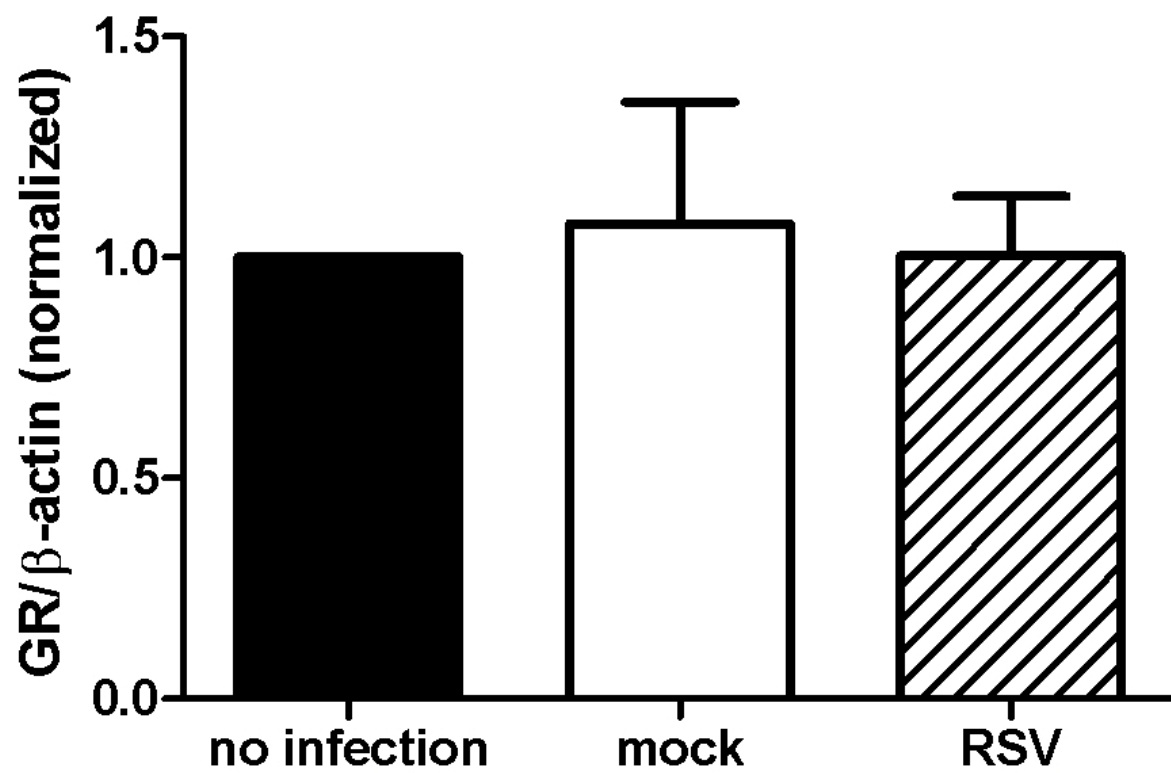



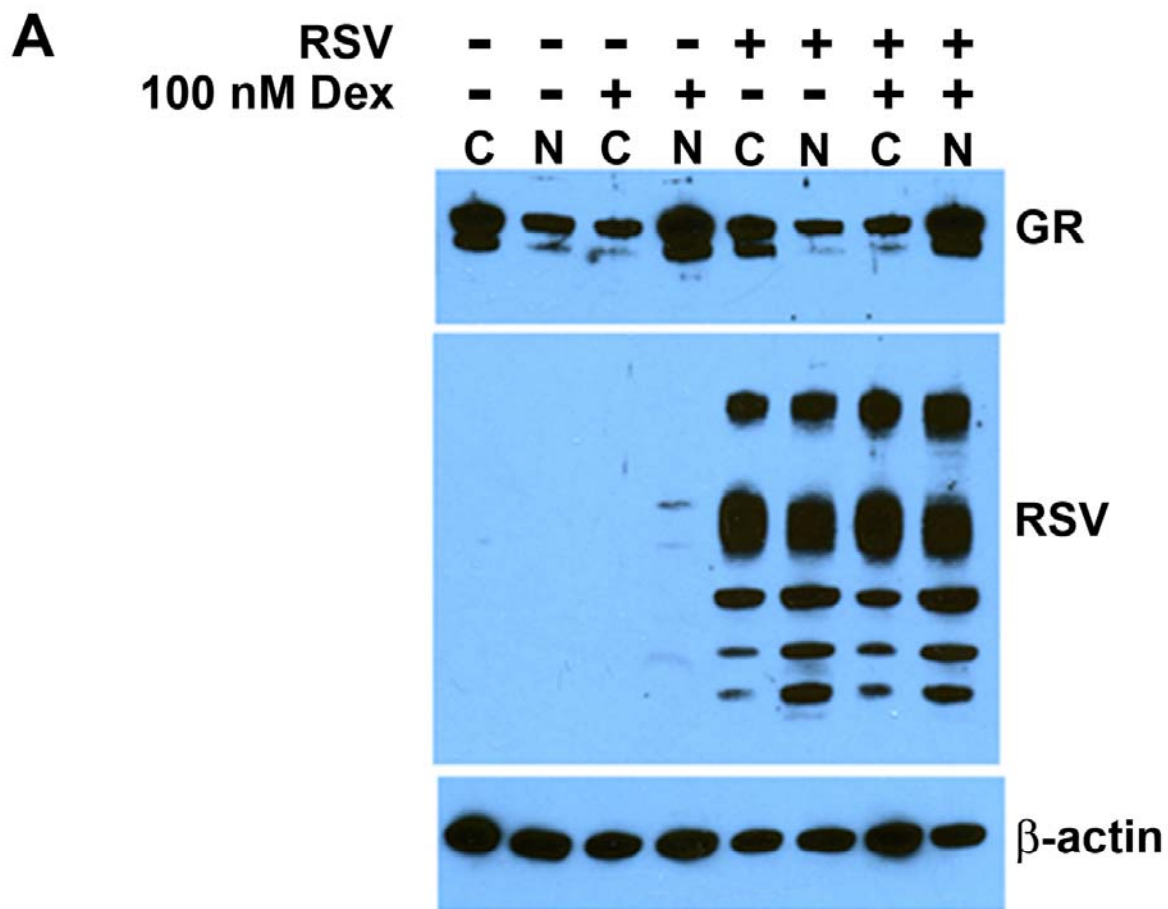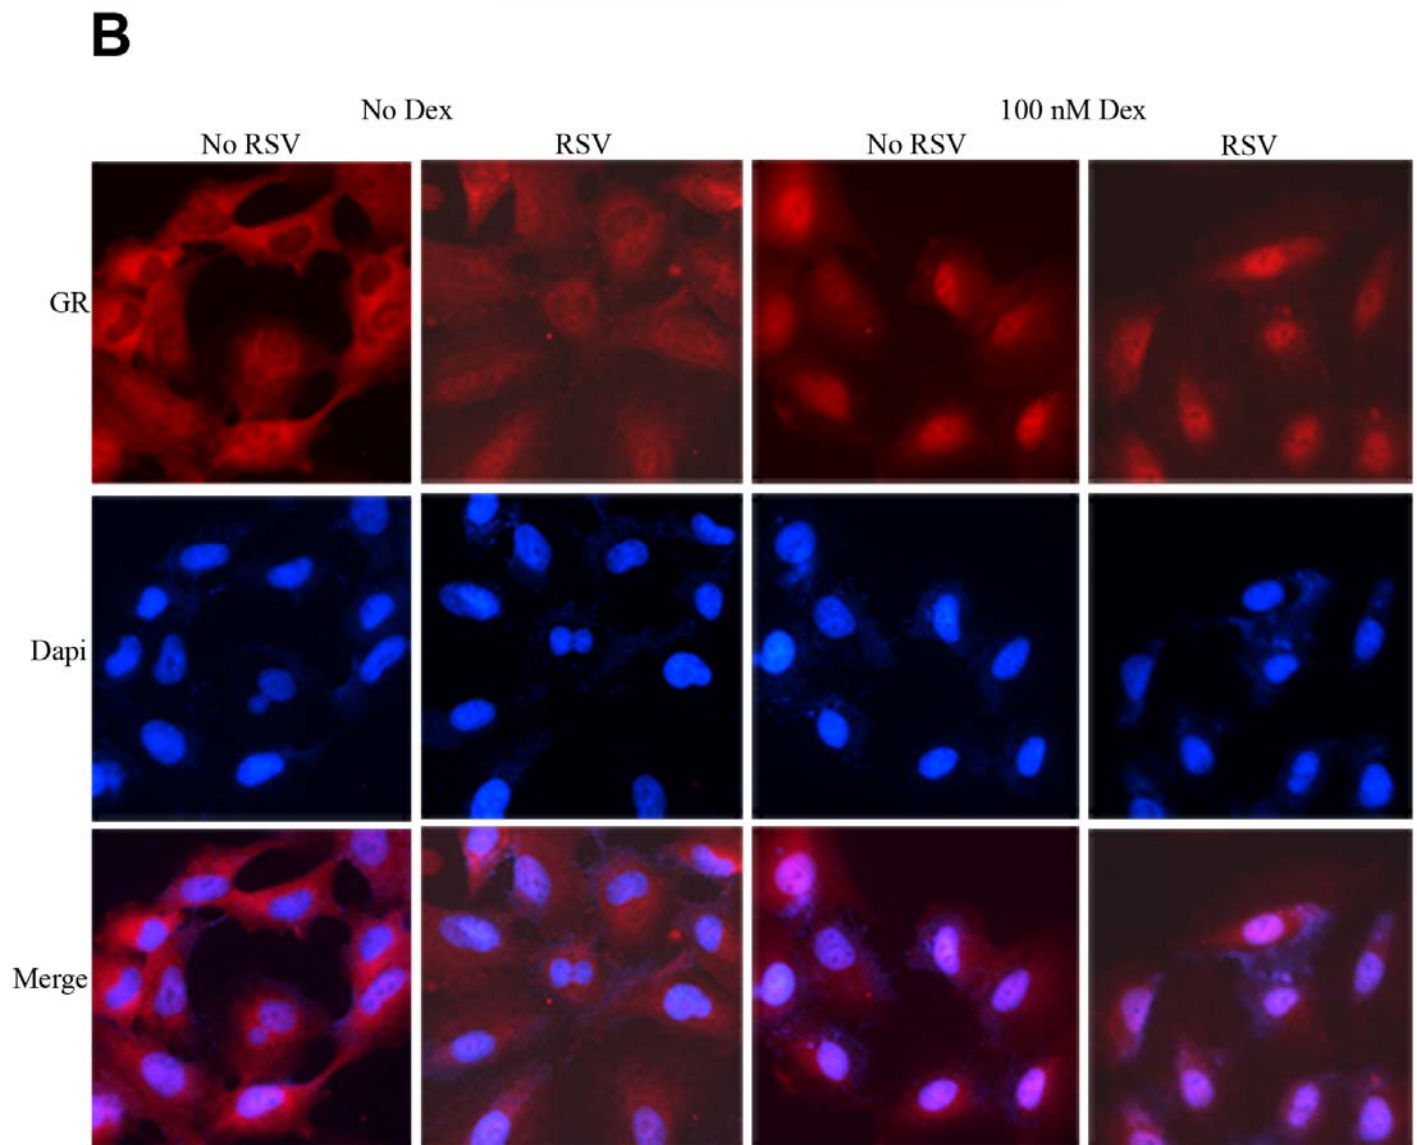

TABLE 1. Real-time PCR primers.

| Gene name | Accession number | Direction | Primer sequence (5'-3')   | Reference |
|-----------|------------------|-----------|---------------------------|-----------|
| CAP-1     | NM_006367.3      | F         | ATCCCTGGATTGTGAAATAGTC    | (26)      |
|           |                  | R         | ATTAAAGTCACCGCCTTCTGTAG   |           |
| FKBP51    | NM_004117        | F         | TCCCTCGAATGCAACTCTCT      |           |
|           |                  | R         | AAACATCCTTCCACCACAGC      |           |
| GAPDH     | NM_002046.3      | F         | ACTTTGGTATCGTGGAAGGACT    | (26)      |
|           |                  | R         | GTAGAGGCAGGGATGATGTTCT    |           |
| GILZ      | NM_004089        | F         | GCACAATTTCTCCATCTCCTTCTT  | (69)      |
|           |                  | R         | TCAGCATGATTCTTCACCAGATCCA |           |
| IL-6      | NM_000600.2      | F         | CACAGACAGCCACTCACCTC      |           |
|           |                  | R         | TTTTCTGCCAGTGCCTCTTT      |           |
| IL-8      | NM_000584.2      | F         | AGTTTTTGAAGAGGGCTGAGAAT   |           |
|           |                  | R         | CAACAGACCCACACAATACATGA   |           |
| MKP-1     | NM_004417        | F         | CTGCCTTGATCAACGTCTCA      |           |
|           |                  | R         | ACCCTTCCTCCAGCATTCTT      |           |
